# Supplementary material for: Myoglobin and C-reactive protein are efficient and reliable early predictors of COVID-19 associated mortality
Source: PubMed Central journal article supplement (PMC7971049; doi:10.1038/s41598-021-85426-9), 2021-03-16

## **Myoglobin and C-Reactive Protein are Efficient and Reliable Early Predictors of COVID-19 Associated Mortality**

**Ashaq Ali<sup>1,9#</sup>, Muhammad Noman<sup>4#</sup>, Yong Guo<sup>2,10#</sup>, Xu Liu<sup>6#</sup>, Rong Zhang<sup>5,8</sup>, Juan Zhou<sup>1</sup>, Yang Zheng<sup>7</sup>, Xian-En Zhang<sup>7</sup>, Yong Qi<sup>3\*</sup>, Xiaohua Chen<sup>2\*</sup>, Dong Men<sup>1,9\*</sup>**

<sup>1</sup> State Key Laboratory of Virology, Wuhan Institute of Virology, Center for Biosafety Mega-Science, Chinese Academy of Sciences, Wuhan, 430071, China.

<sup>2</sup> Department of Laboratory Medicine, General Hospital of Central Theatre Command, PLA. Wuhan 430070, China.

<sup>3</sup> Medical Department General Hospital of Central Theatre Command, PLA, Wuhan 430070, China

<sup>4</sup> College of Life Science, Engineering Research Center of the Chinese Ministry of Education for Bioreactor and Pharmaceutical Development, Jilin Agricultural University, Changchun 130118, China.

<sup>5</sup> Department of Laboratory Medicine, General Hospital of Southern Theatre Command, PLA. Guangzhou 510010, China.

<sup>6</sup> Department of Biochemistry and Molecular Biology, Medical College, Hubei Minzu University, Enshi 445000, Hubei, China.

<sup>7</sup> National Laboratory of Biomacromolecules, CAS Center for Excellence in Biomacromolecules, Institute of Biophysics, Chinese Academy of Sciences, Beijing, 100101, China.

<sup>8</sup> Joint Expert Group for COVID-19, Wuhan Huoshenshan Hospital, Wuhan, Hubei 430100, China.

<sup>9</sup> University of Chinese Academy of Sciences, Beijing, 100049, China.

<sup>10</sup> Department of Pathology, General Hospital of Central Theatre Command, PLA. Wuhan 430070, China.

# Contributed equally

\* Correspondence: [qiy9527@163.com](mailto:qiy9527@163.com) (Y.Q.); [cxhniuniu@163.com](mailto:cxhniuniu@163.com) (X.C.); [d.men@wh.iov.cn](mailto:d.men@wh.iov.cn) (D.M.)

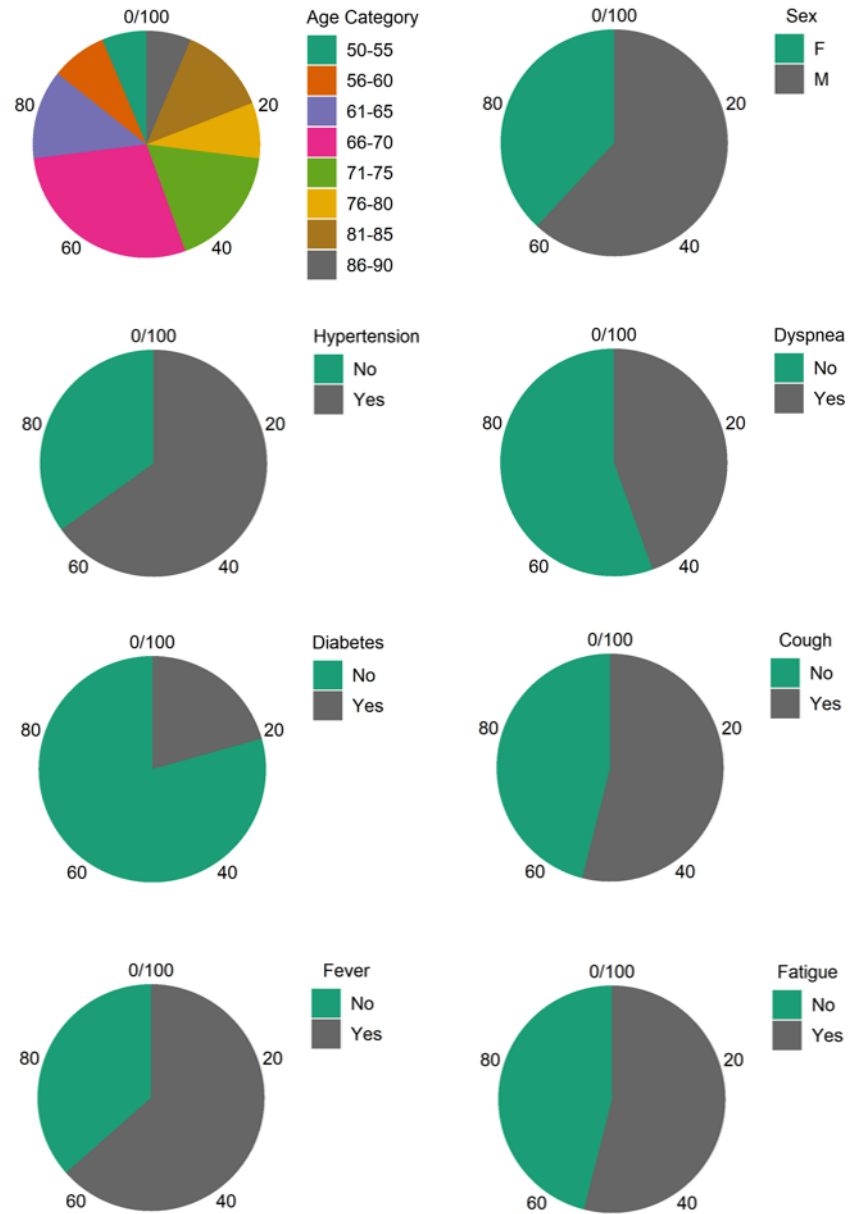

**Figure S1: Age, sex, comorbidities and major initial symptoms in all patients**

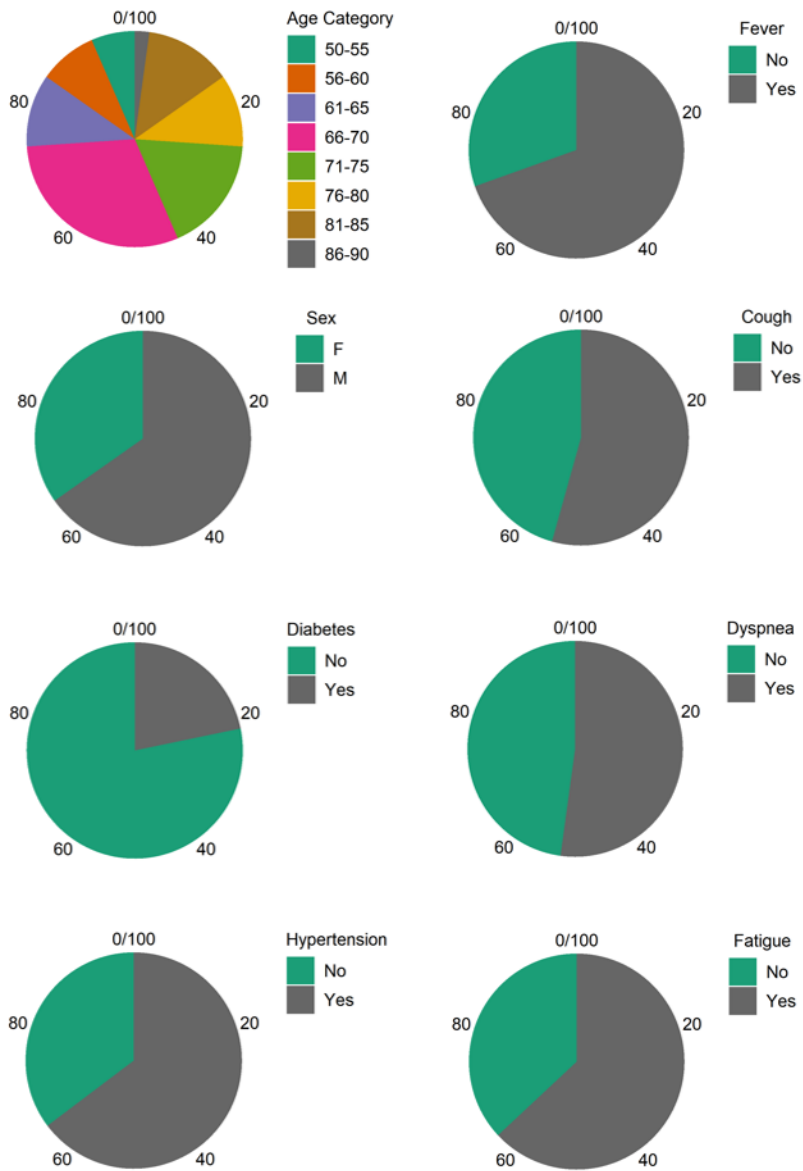

**Figure S2: Age, sex, comorbidities and major initial symptoms in deceased patients**

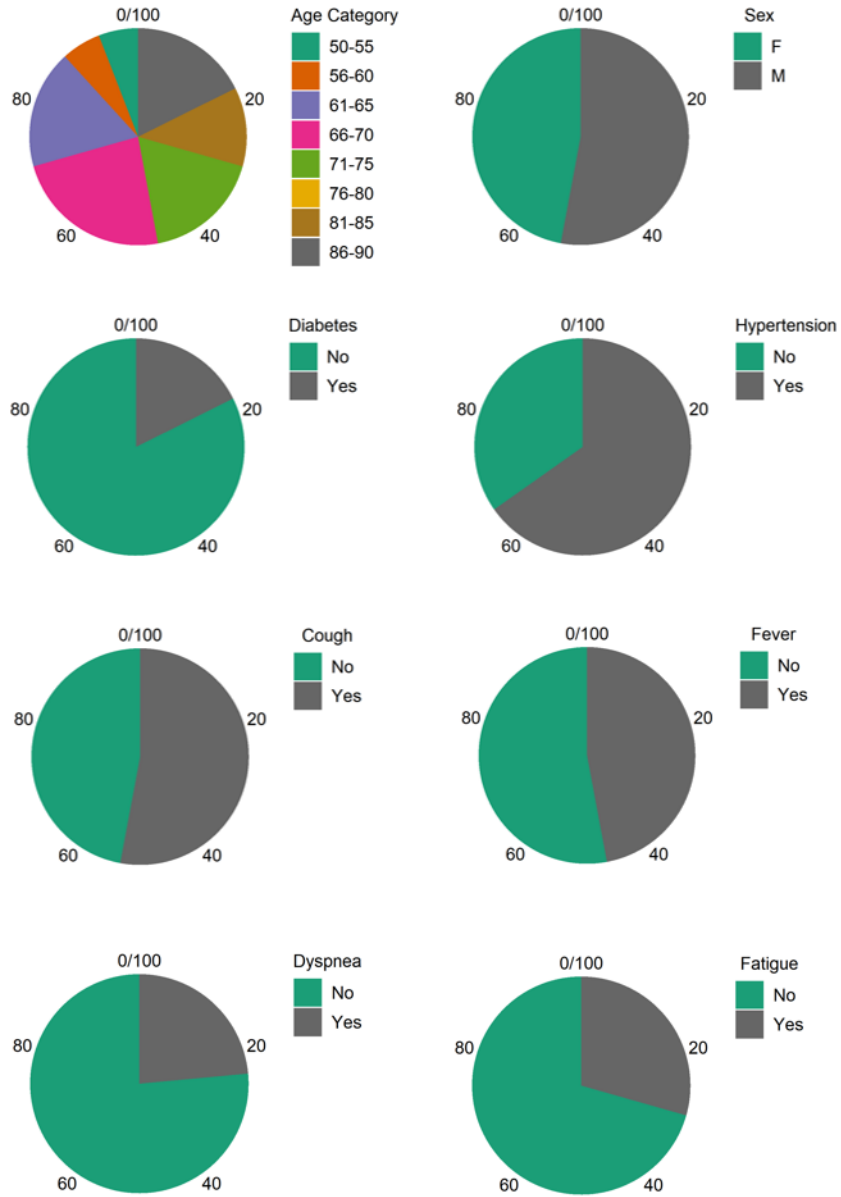

**Figure S3: Age, sex, comorbidities and major initial symptoms in recovered patients**

## Appendix A: Boxplots of the rest of laboratory parameters

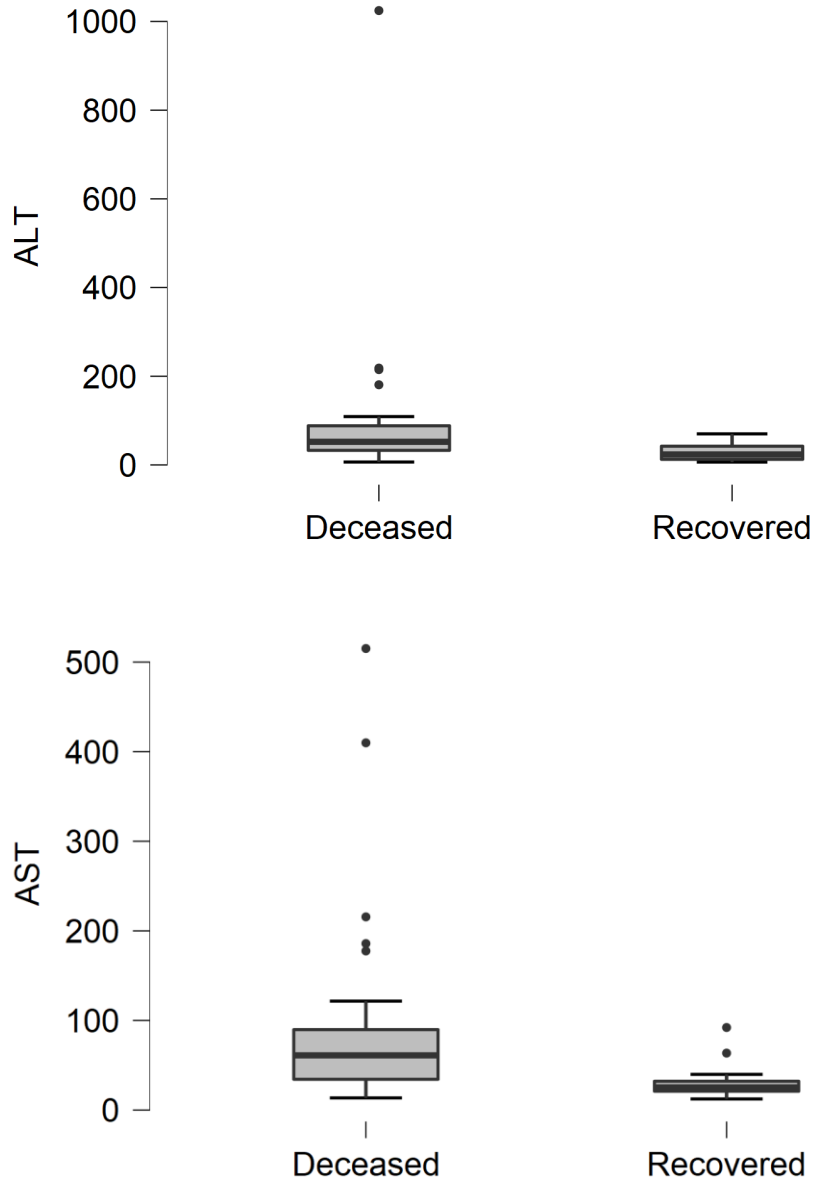

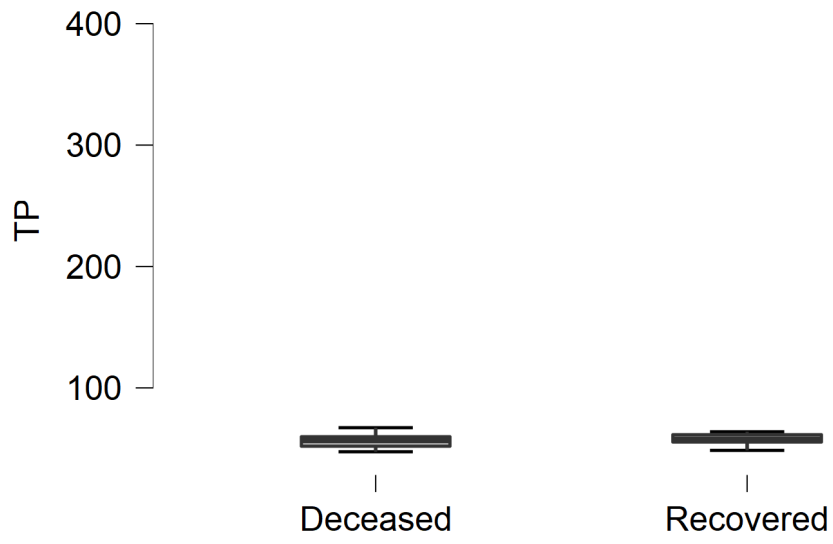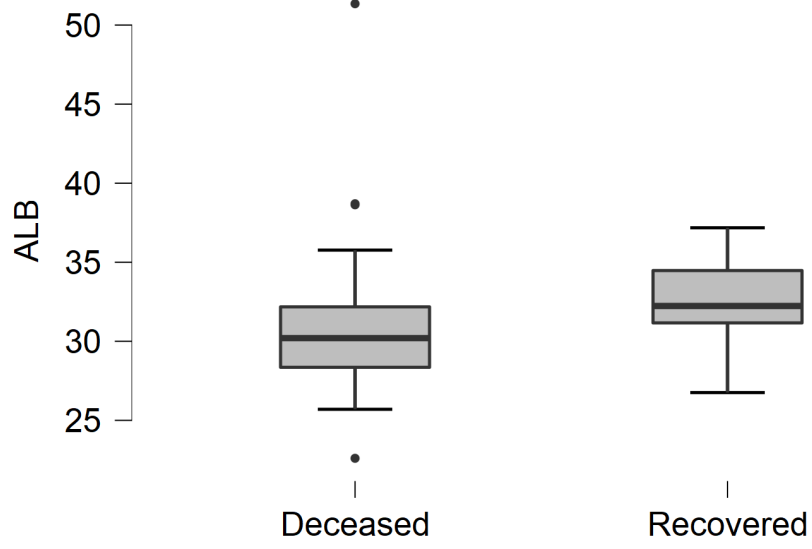

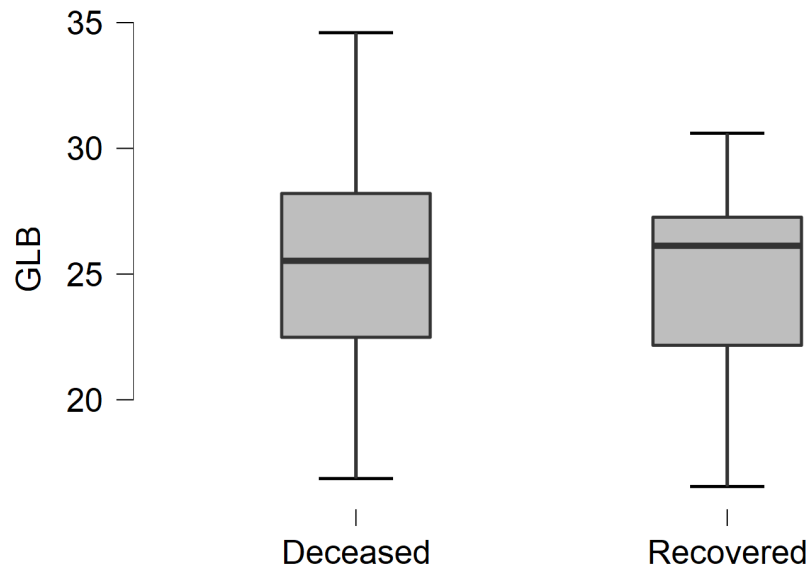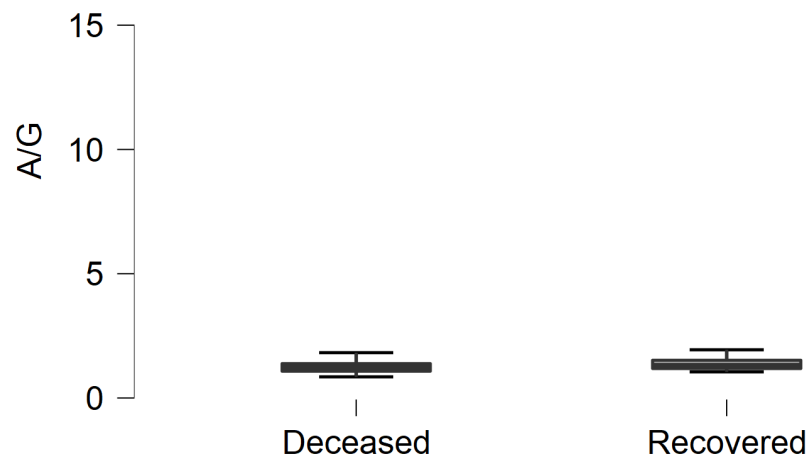

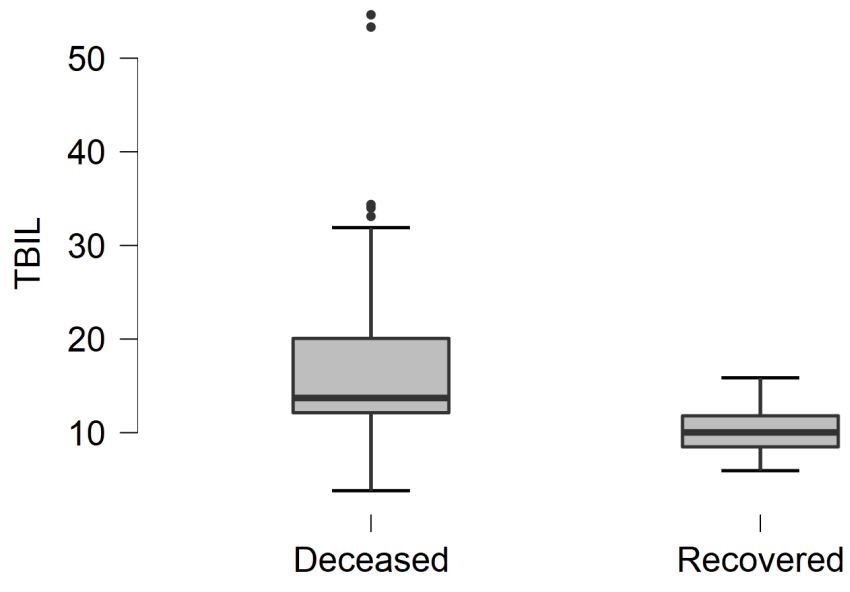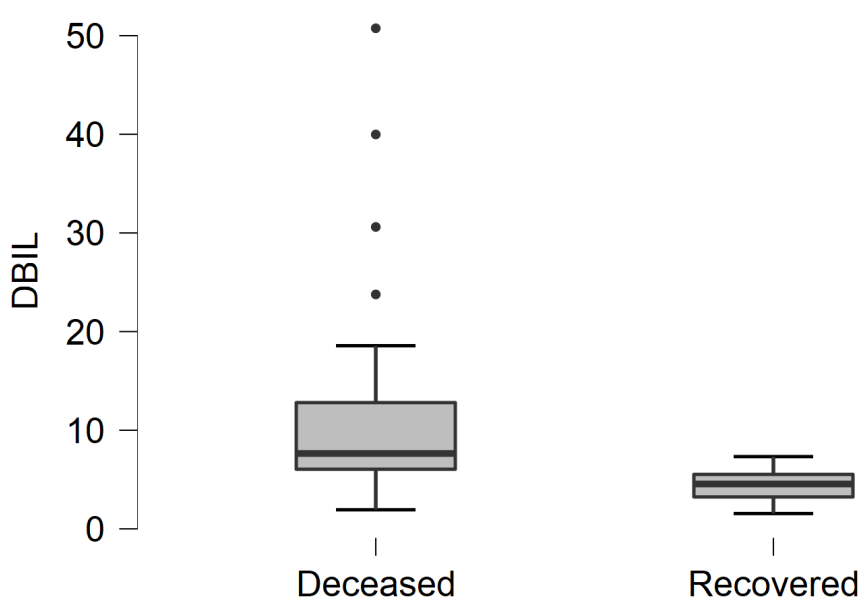



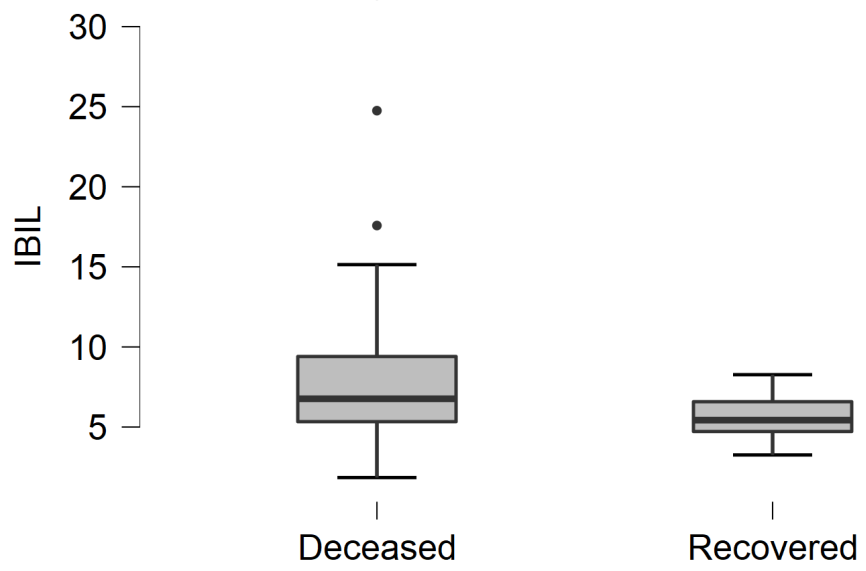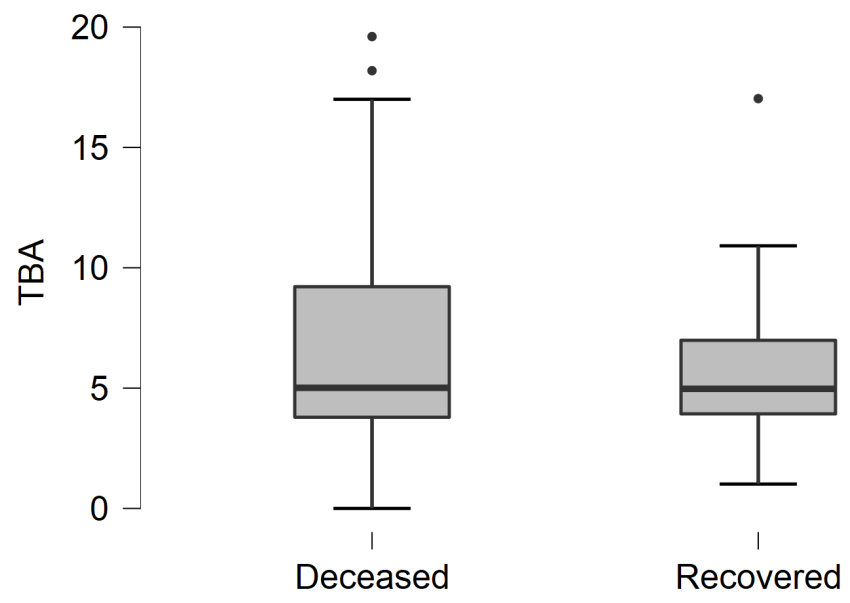

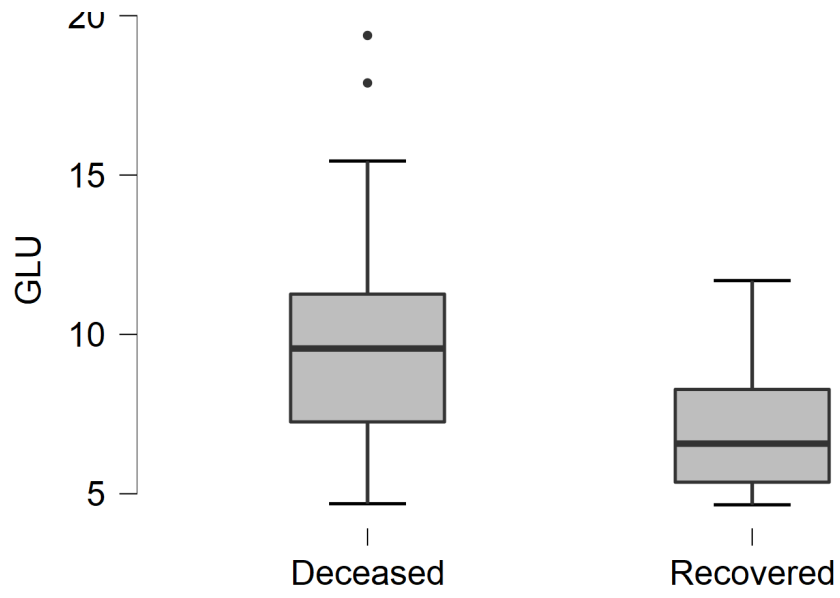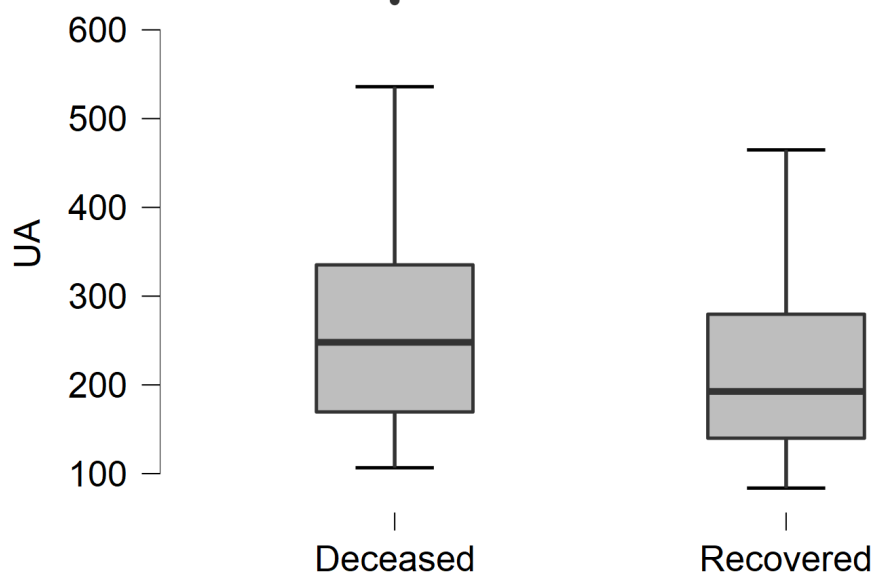

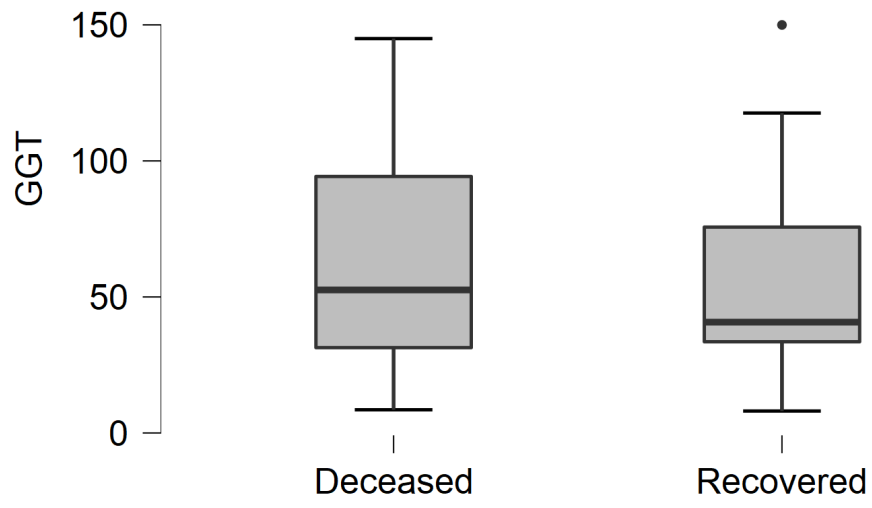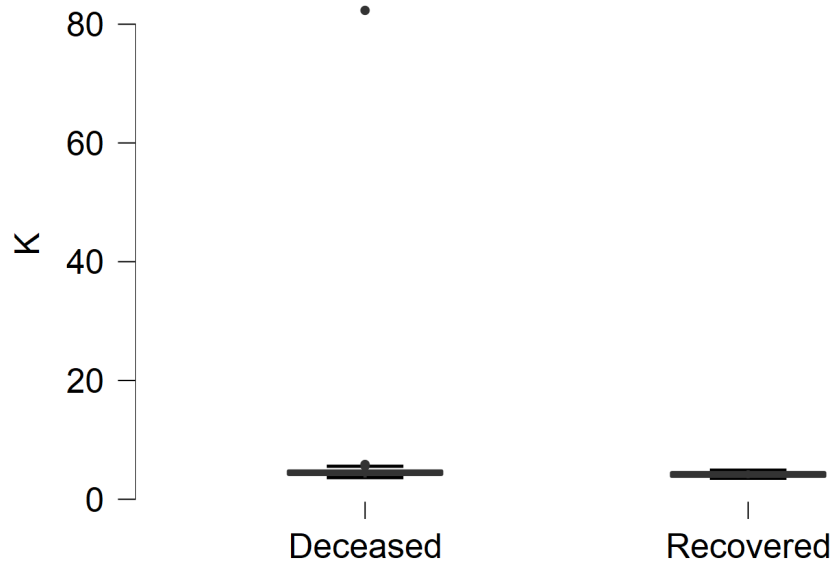

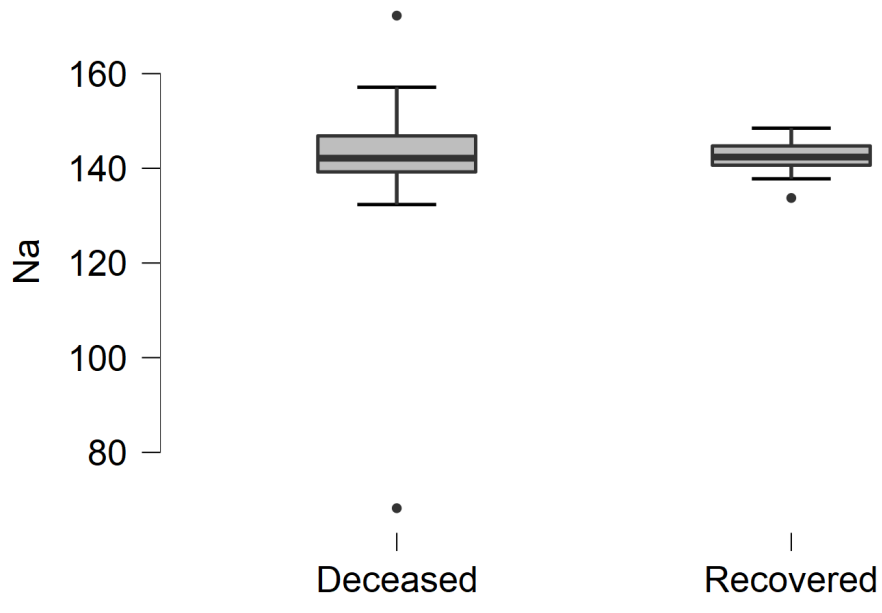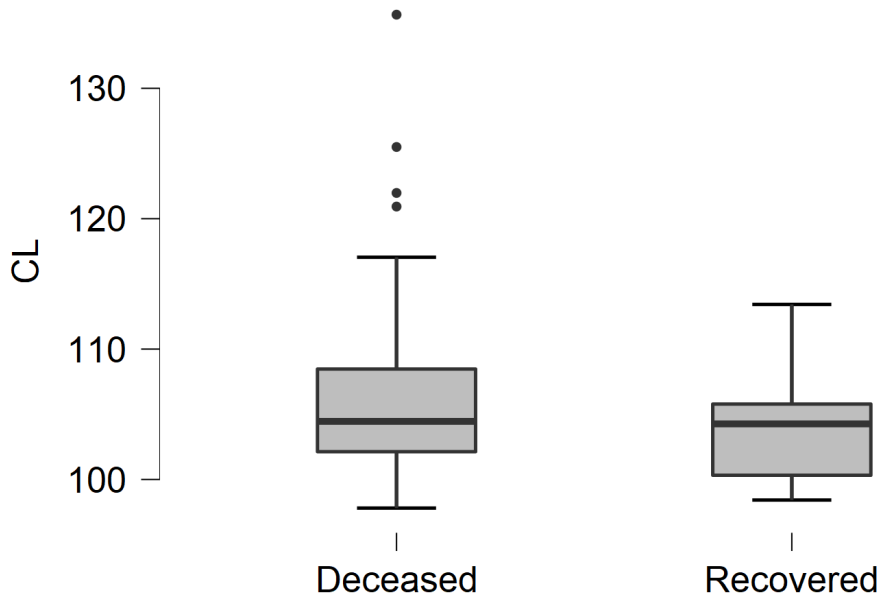

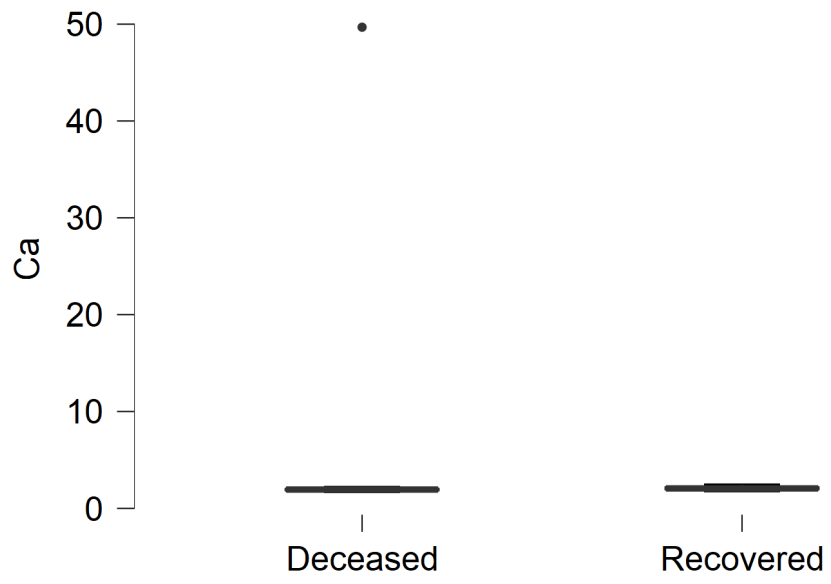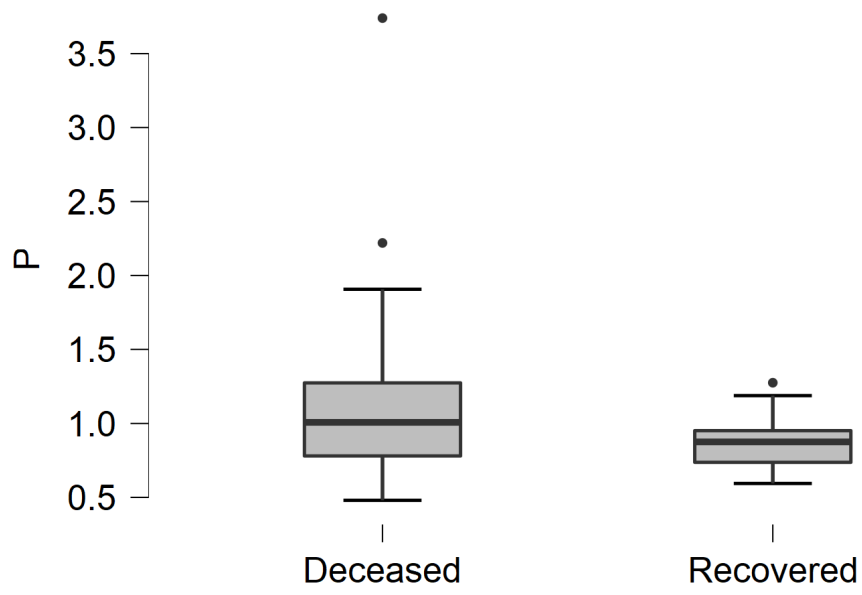

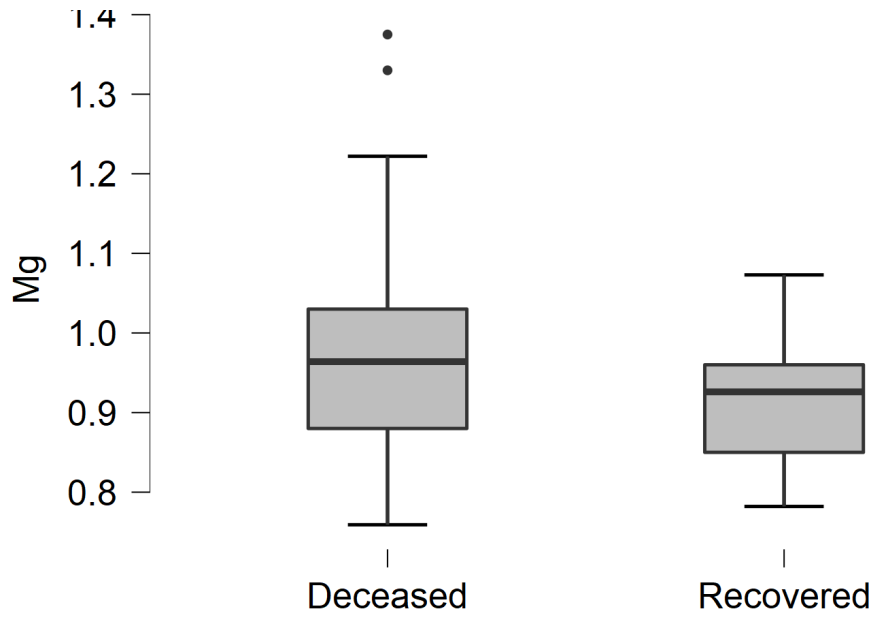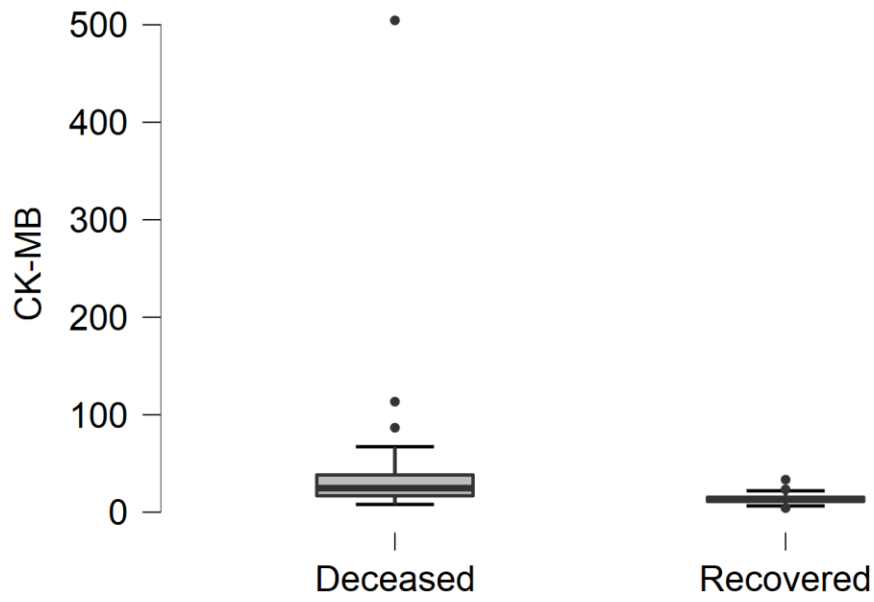

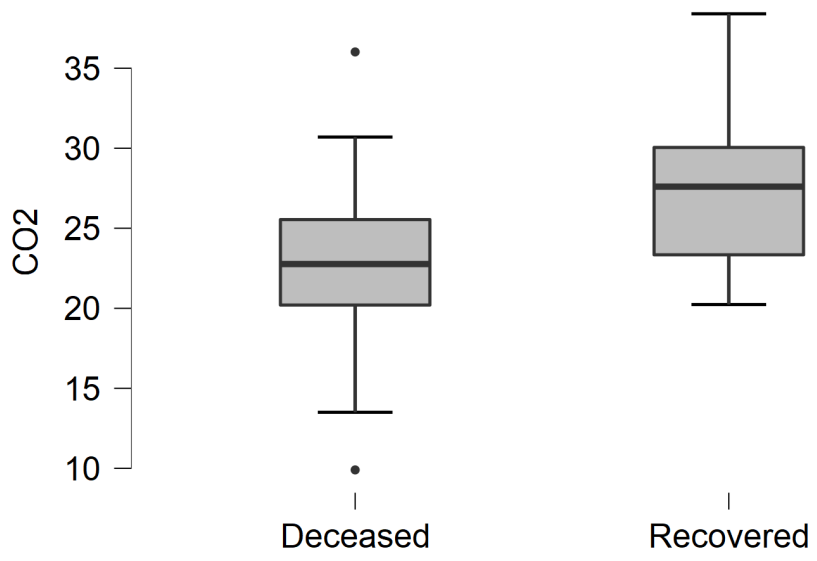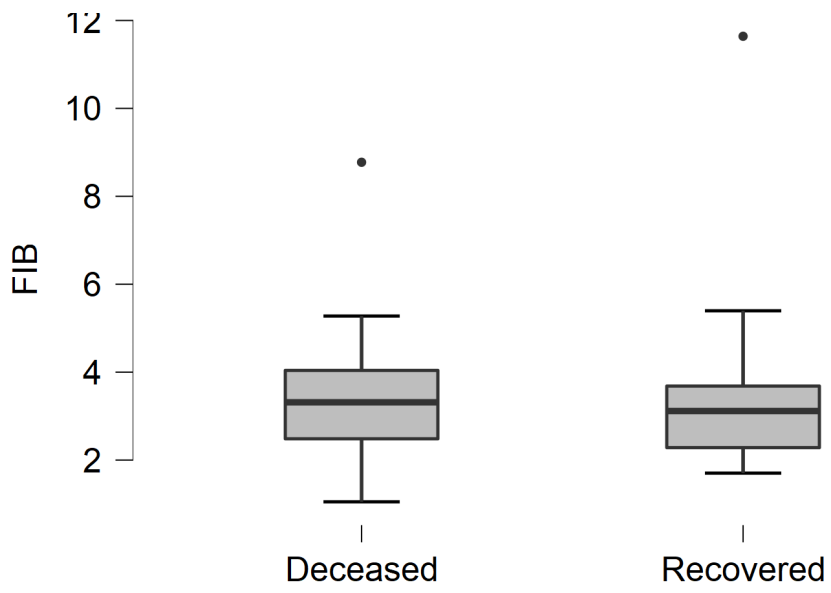

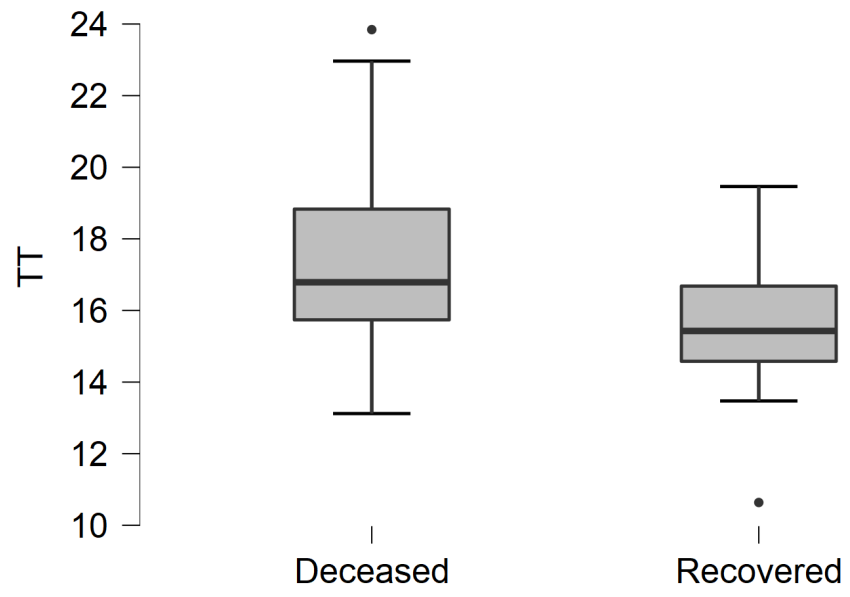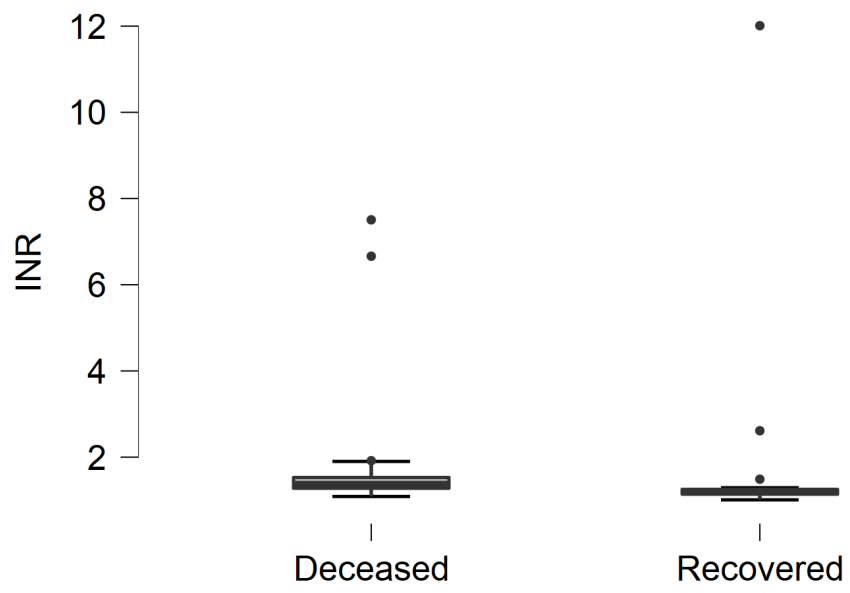



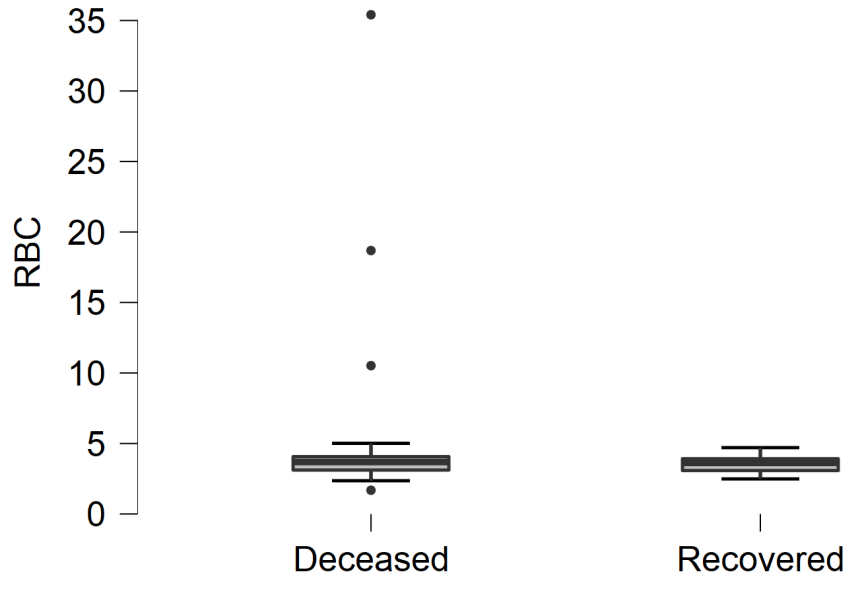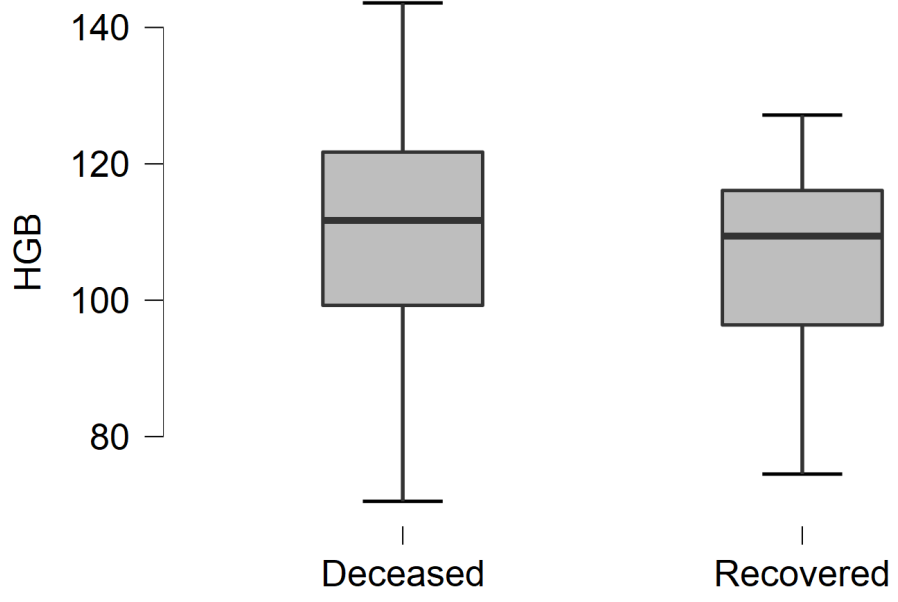

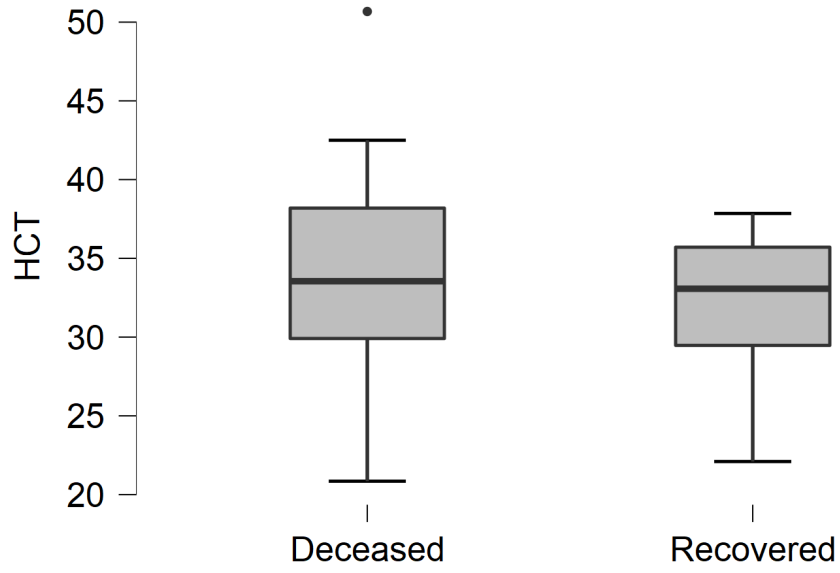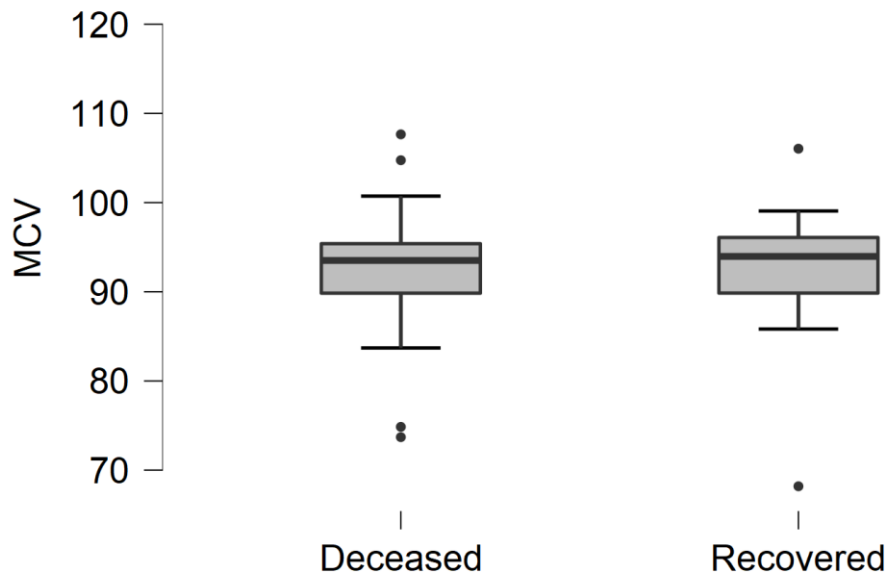

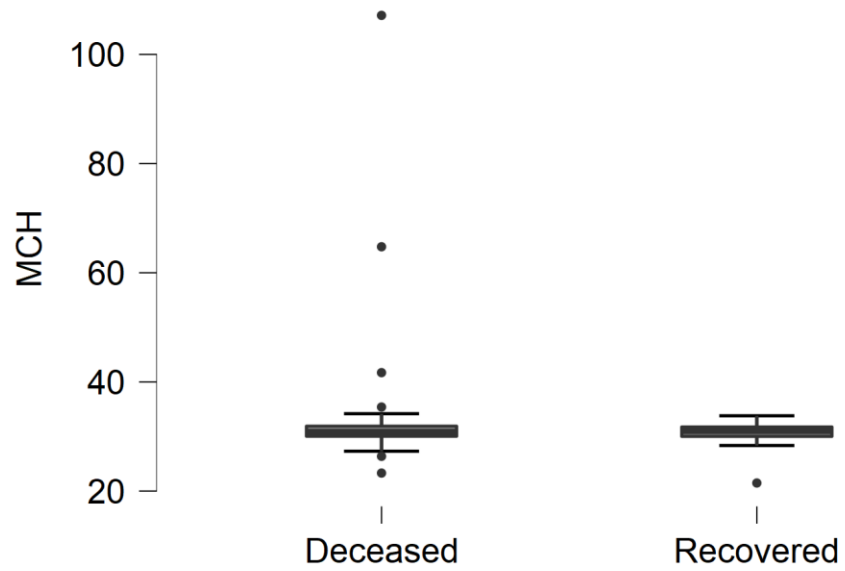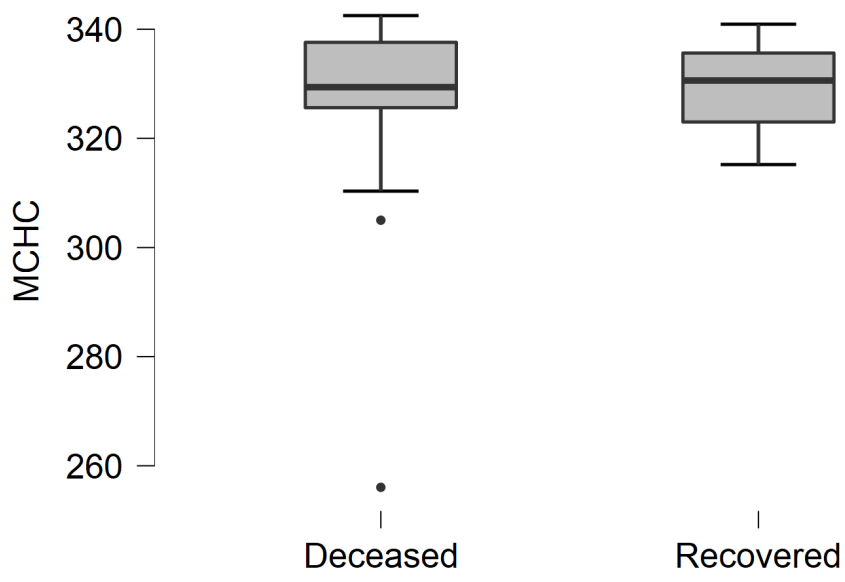

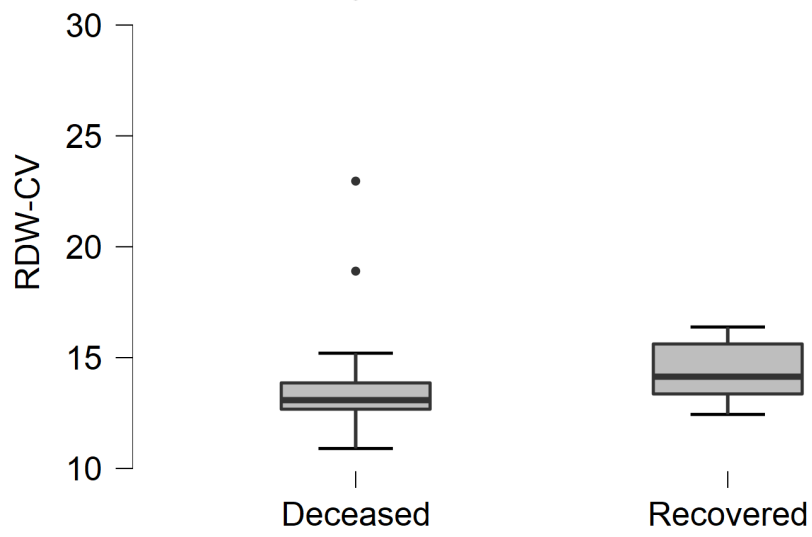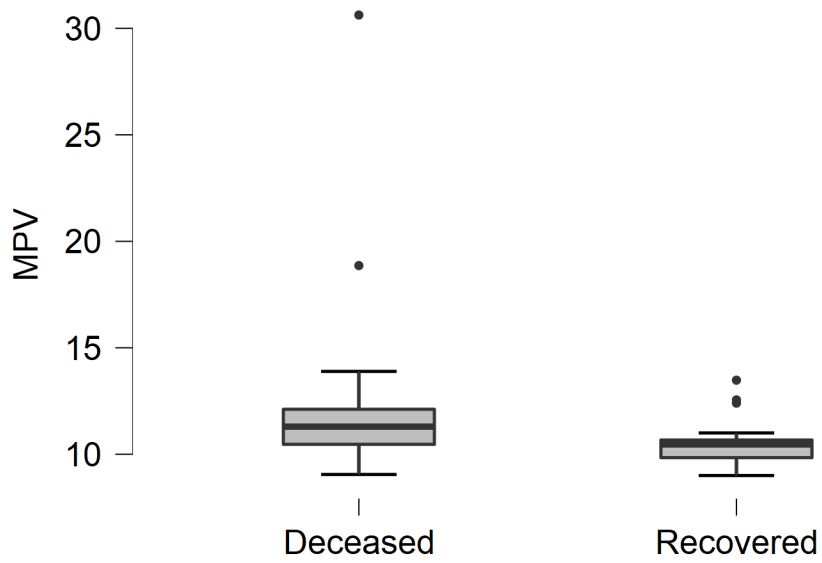

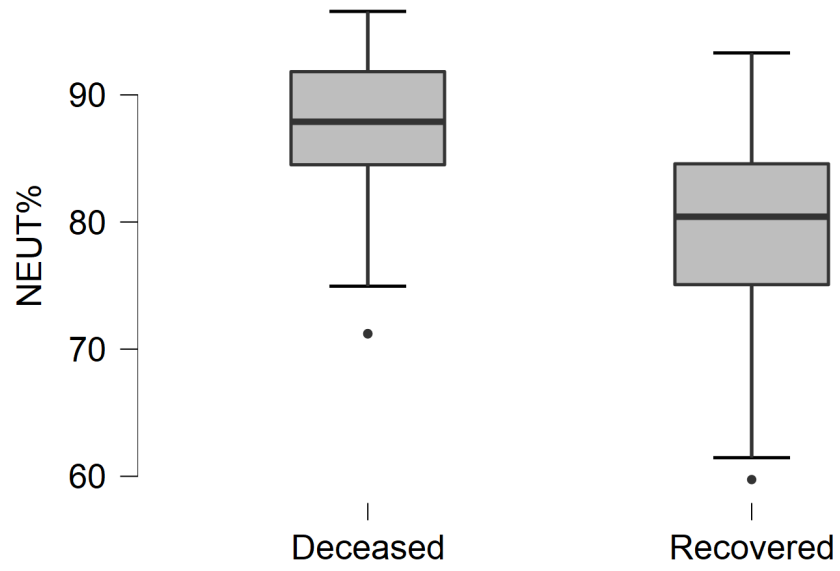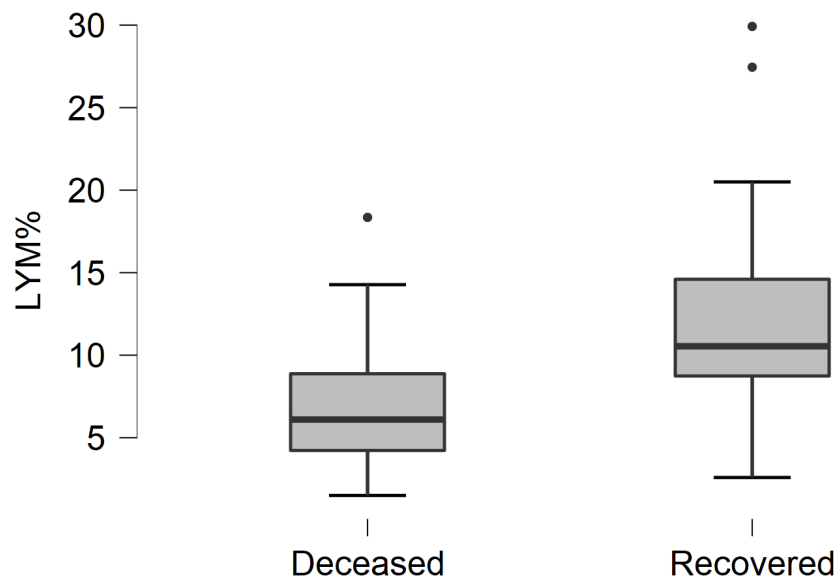

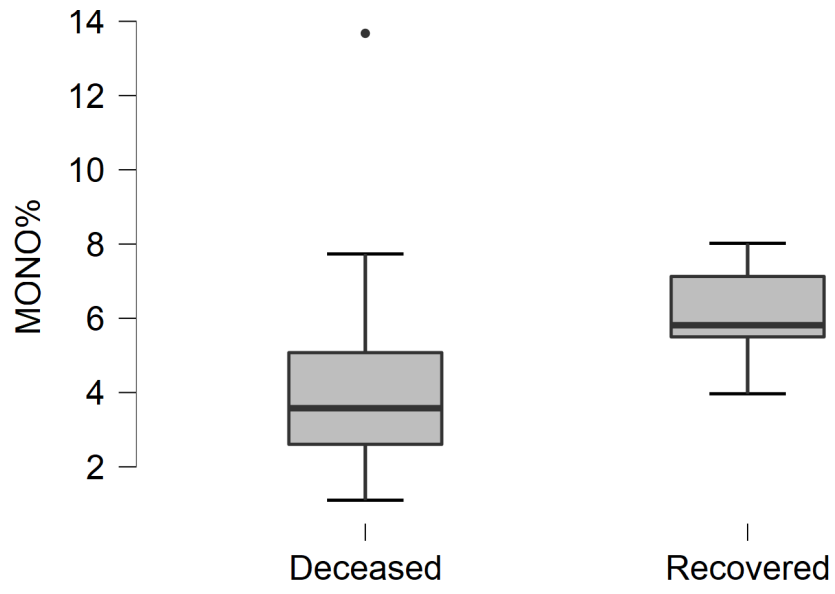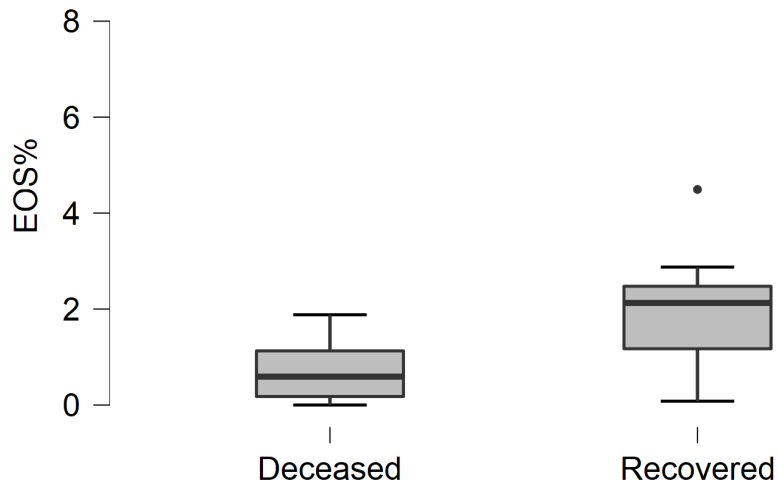

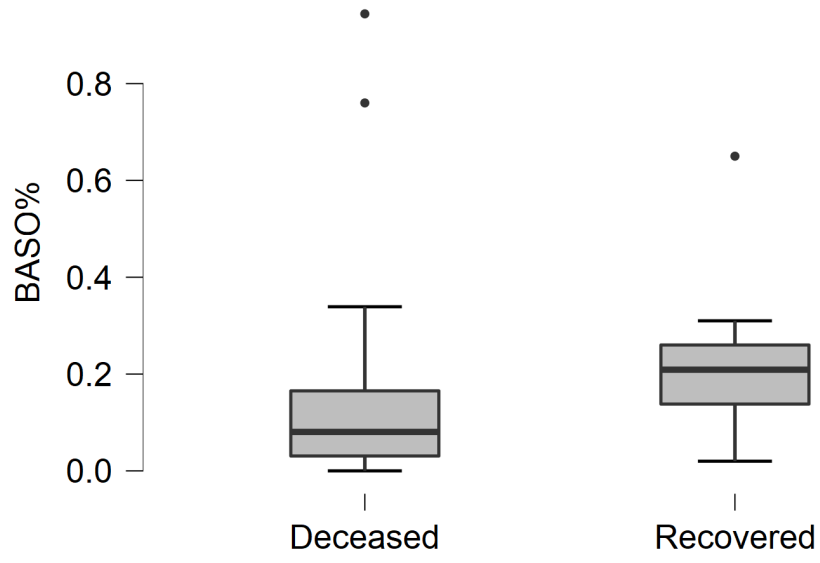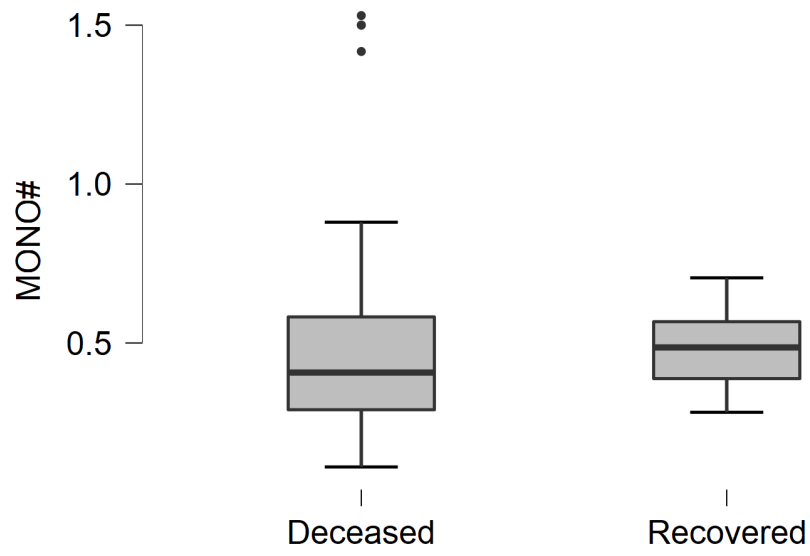

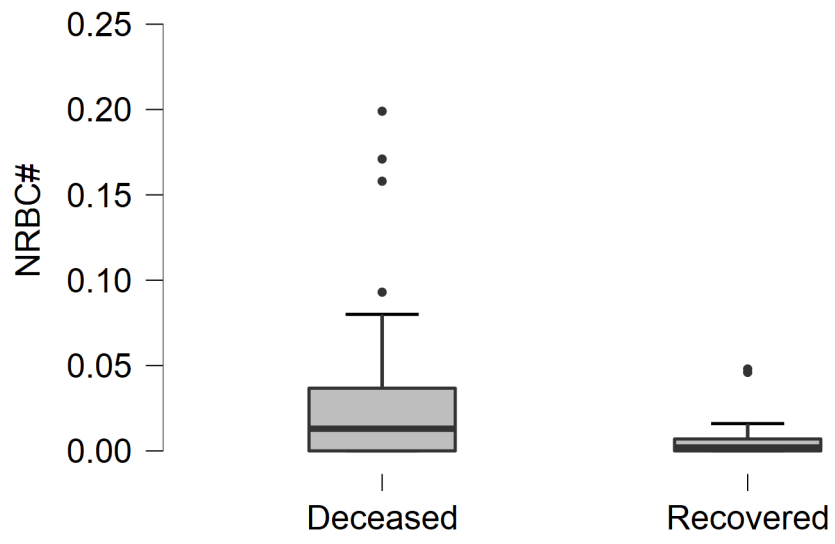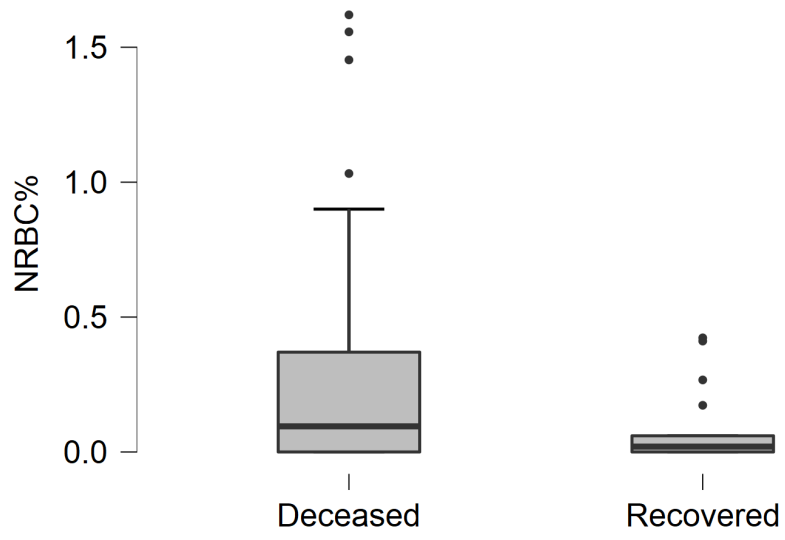



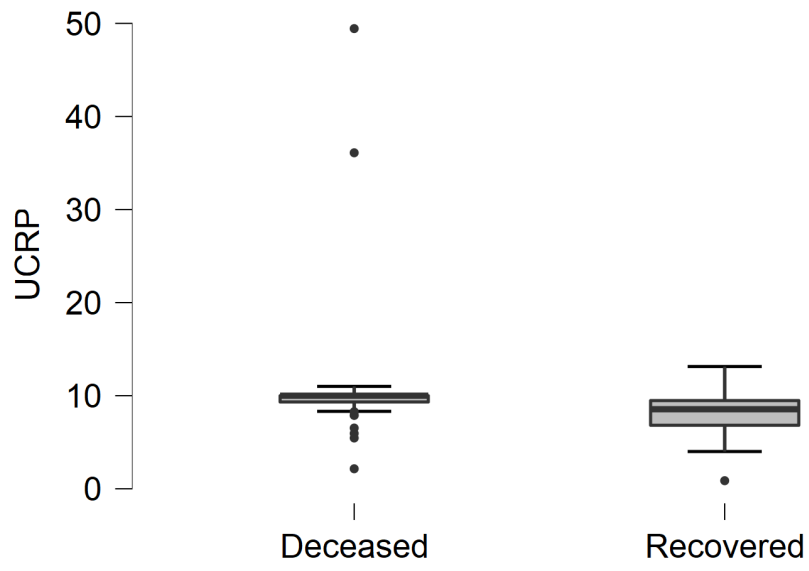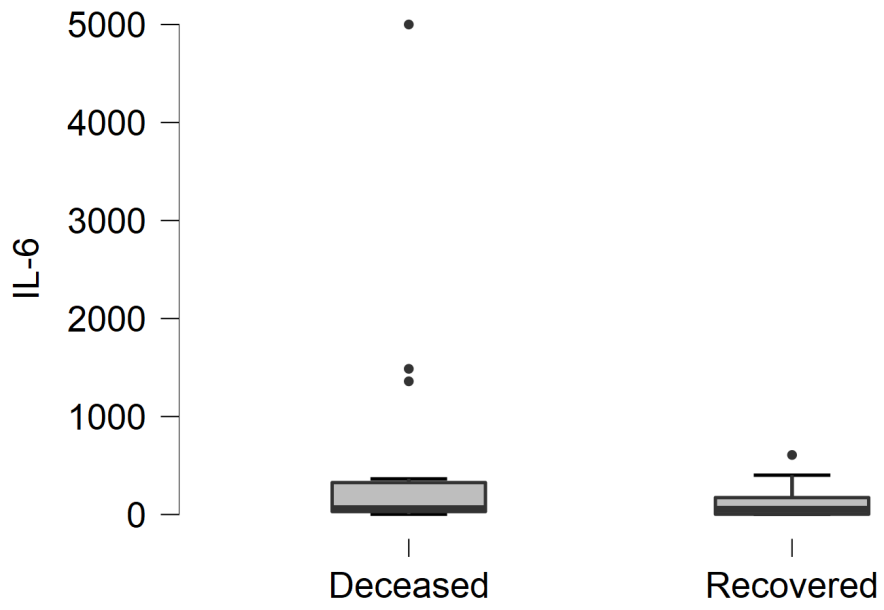

Supplement: 41598_2021_85426_MOESM2_ESM.pdf [file 41598_2021_85426_MOESM2_ESM.pdf]
